# Supplementary material for: Assessing the Performance of Continuous-Flow Microbial Fuel Cells and Membrane Electrode Assembly with Electrodeposited Mn Oxide Catalyst
Source: MDPI journal article supplement (doi:10.3390/en17040943), 2024-02-17
Supplement: s1 [file s1]

# Assessing the Performance of Continuous-Flow Microbial Fuel Cells and Membrane Electrode Assembly with Electrodeposited Mn Oxide Catalyst

Laura Mais, Michele Mascia \* and Annalisa Vacca

Dipartimento di Ingegneria Meccanica, Chimica e dei Materiali, Università degli Studi di Cagliari,  
Via Marengo 2, 09123 Cagliari, Italy

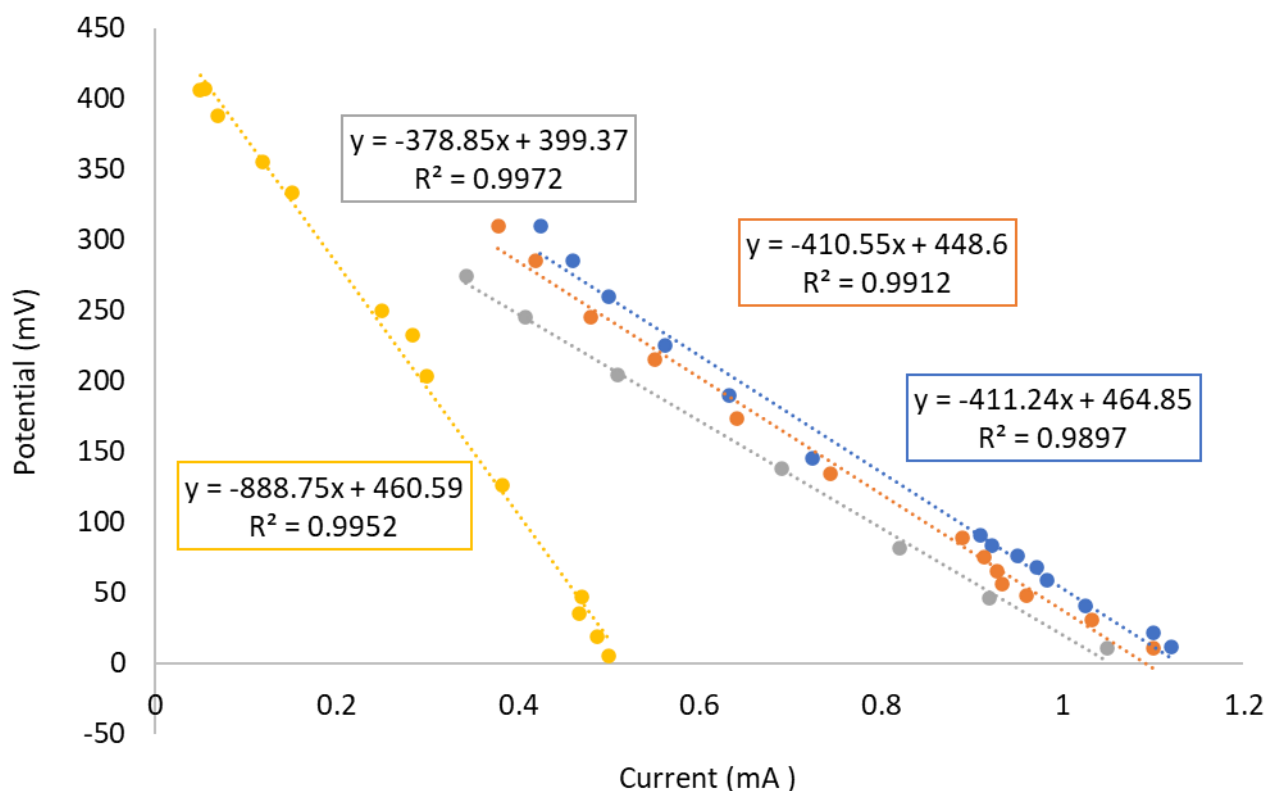

**Figure S1:** Slopes of the linear region of the polarization curves for the determination of the internal resistances (AC/CB in yellow; Mn100 in grey; Mn20 in orange and Mn10 in blue).

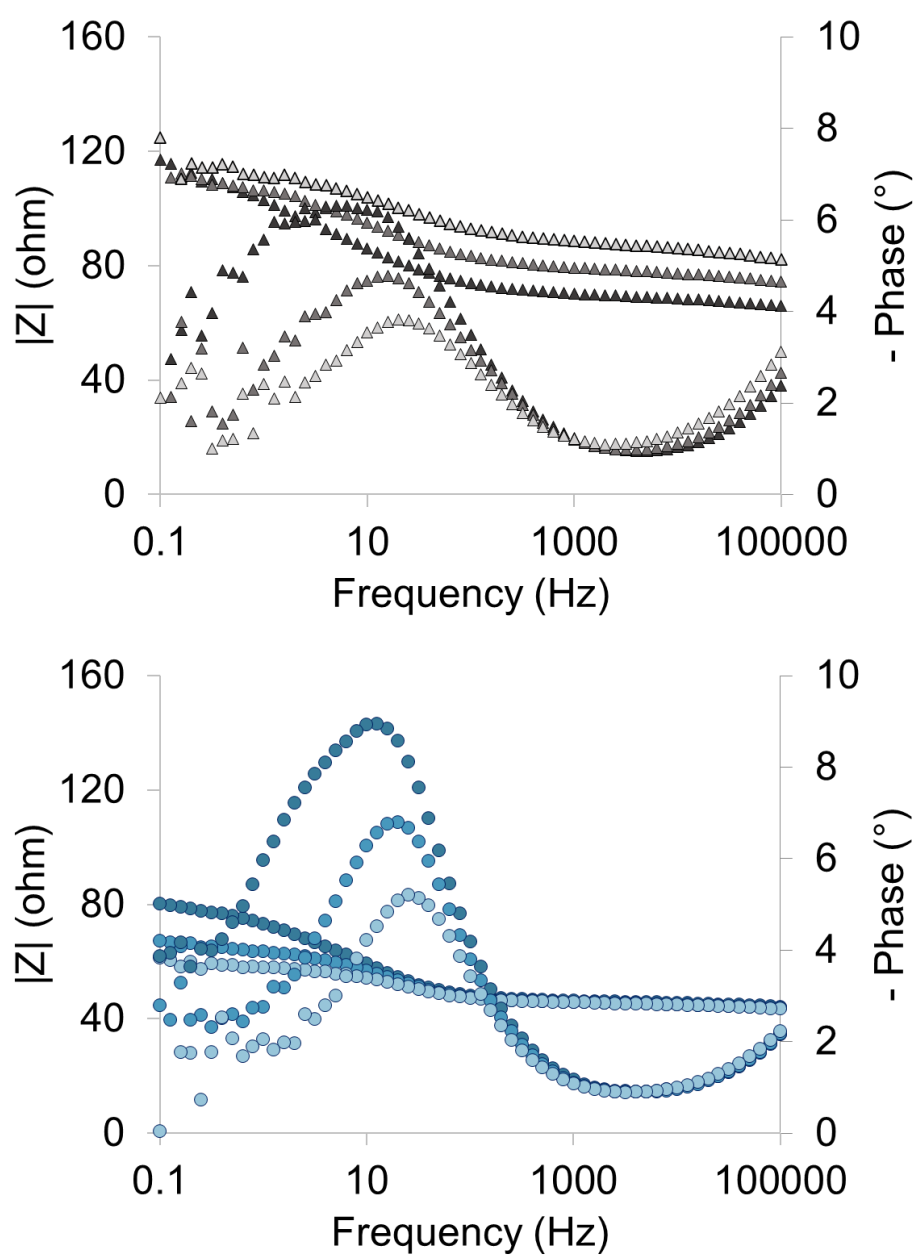

**Figure S2:** Bode plots obtained from EIS experiments with Mn10 electrodes under dry (black symbols) and saturated air (blue symbols) conditions.

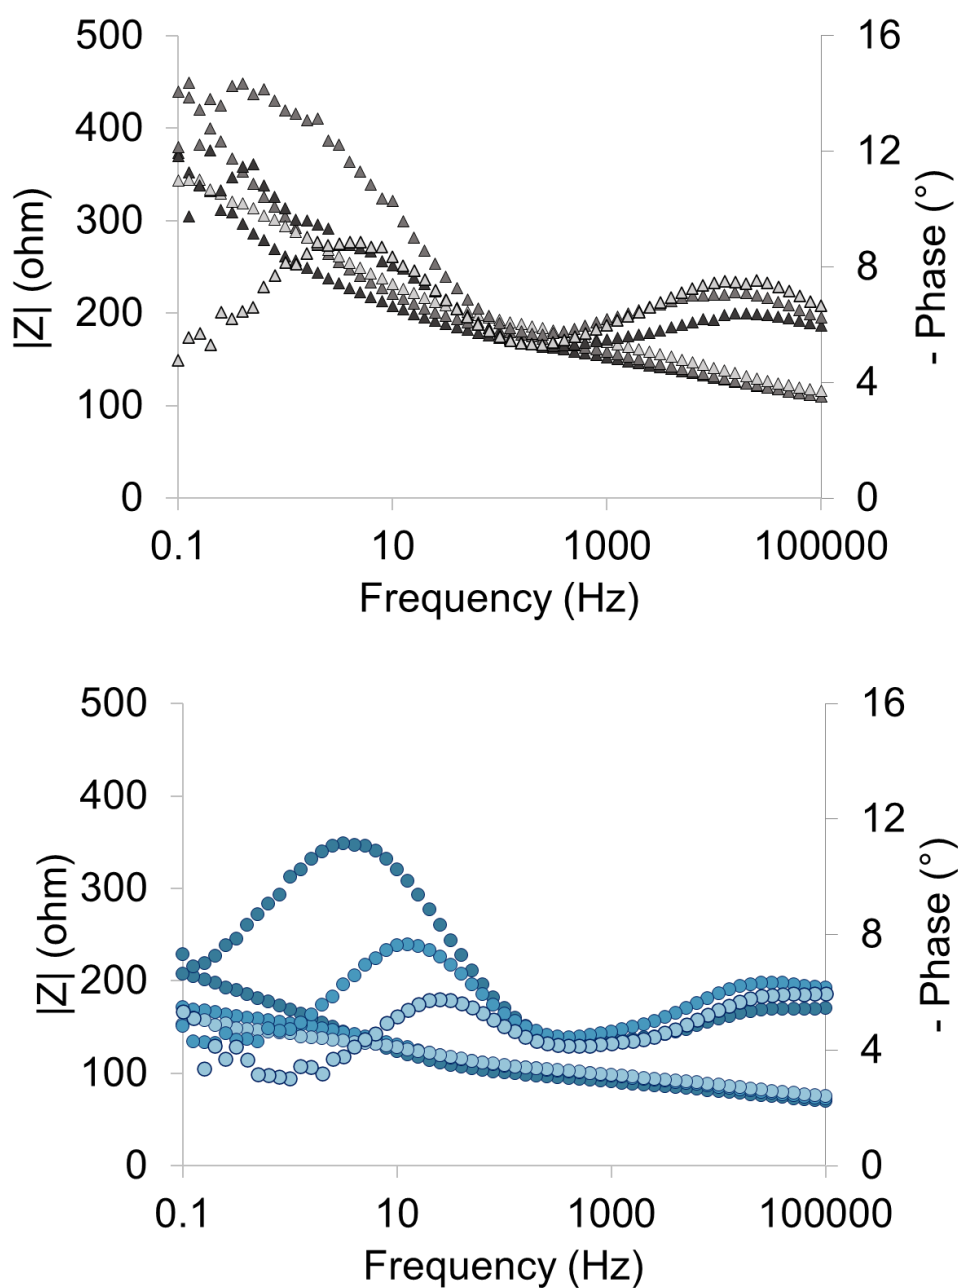

**Figure S3:** Bode plots obtained from EIS experiments with AC/CB electrodes under dry (black symbols) and saturated air (blue symbols) conditions.

**Table S1 a-d:** Parameters of the equivalent circuits used to characterise the cathodes

**Table S1 a:** Mn10 Electrode

|                                          | Dry air<br>Potential applied / V |                |                | Saturated air<br>Potential applied / V |                |                |
|------------------------------------------|----------------------------------|----------------|----------------|----------------------------------------|----------------|----------------|
|                                          | -1.7                             | -1.9           | -2.1           | -1.7                                   | -1.9           | -2.1           |
| chi-squared ( $\chi^2$ ) K-K analysis    | 5.24 $10^{-5}$                   | 5.24 $10^{-5}$ | 5.24 $10^{-5}$ | 1.56 $10^{-6}$                         | 7.44 $10^{-6}$ | 5.21 $10^{-5}$ |
| chi-squared ( $\chi^2$ )                 | 1.11 $10^{-4}$                   | 1.11 $10^{-4}$ | 1.11 $10^{-4}$ | 2.80 $10^{-5}$                         | 1.70 $10^{-5}$ | 3.20 $10^{-5}$ |
| $R_{\Omega} / \Omega \text{ cm}^2$       | 322                              | 362            | 401            | 197.8                                  | 194.1          | 185.7          |
| $Q_{DL} / \text{mS s}^n \text{ cm}^{-2}$ | 0.76                             | 0.58           | 0.58           | 0.54                                   | 0.37           | 0.44           |
| n                                        | 0.52                             | 0.56           | 0.59           | 0.7                                    | 0.6            | 0.6            |
| $R_{CT} / \Omega \text{ cm}^2$           | 244                              | 169.5          | 126.35         | 155.1                                  | 89.5           | 66.1           |
| $Q_{cont} / \mu\text{F cm}^{-2}$         | 1.1                              | 0.85           | 0.76           | 1.34                                   | 5              | 3.6            |
| n                                        | 0.78                             | 0.76           | 0.83           | 0.68                                   | 0.76           | 0.75           |
| $R_{cont} / \Omega \text{ cm}^2$         | 21.25                            | 27.2           | 35.8           | 31.1                                   | 34             | 40.5           |
| $W / \text{S s}^{-0.5} \text{ cm}^{-2}$  | 0.076                            | 0.084          | 0.06           | 0.042                                  | 0.052          | 0.076          |

**Table S1 b:** Mn10 Electrode after previous EIS series

|                                          | Dry air<br>Potential applied / V |
|------------------------------------------|----------------------------------|
|                                          | -1.7                             |
| chi-squared ( $\chi^2$ ) K-K analysis    | 1.21 $10^{-6}$                   |
| chi-squared ( $\chi^2$ )                 | 4.49 $10^{-6}$                   |
| $R_{\Omega} / \Omega \text{ cm}^2$       | 305                              |
| $Q_{DL} / \text{mS s}^n \text{ cm}^{-2}$ | 0.5                              |
| n                                        | 0.63                             |
| $R_{CT} / \Omega \text{ cm}^2$           | 157.4                            |
| $Q_{cont} / \mu\text{F cm}^{-2}$         | 5                                |
| n                                        | 0.48                             |
| $R_{cont} / \Omega \text{ cm}^2$         | 144.95                           |
| $Q_3 / \text{mS s}^n \text{ cm}^{-2}$    | 1.8                              |
| n                                        | 0.99                             |
| $R_3 / \Omega \text{ cm}^2$              | 112.5                            |
| $W / \text{S s}^{-0.5} \text{ cm}^{-2}$  | 0.04                             |

**Table S1 c: AC/CB electrode**

|                                                                 | Dry air<br>Potential applied / V |                      |                      | Saturated air<br>Potential applied / V |                      |                      |
|-----------------------------------------------------------------|----------------------------------|----------------------|----------------------|----------------------------------------|----------------------|----------------------|
|                                                                 | -1.7                             | -1.9                 | -2.1                 | -1.7                                   | -1.9                 | -2.1                 |
| <b>chi-squared (<math>\chi^2</math>)</b><br><b>K-K analysis</b> | $7.87 \cdot 10^{-5}$             | $7.72 \cdot 10^{-5}$ | $9.85 \cdot 10^{-4}$ | $5.52 \cdot 10^{-6}$                   | $6.57 \cdot 10^{-5}$ | $6.79 \cdot 10^{-5}$ |
| <b>chi-squared (<math>\chi^2</math>)</b>                        | $1.25 \cdot 10^{-4}$             | $5.26 \cdot 10^{-5}$ | $2.94 \cdot 10^{-5}$ | $9.34 \cdot 10^{-6}$                   | $2.4 \cdot 10^{-6}$  | $1.25 \cdot 10^{-4}$ |
| <b><math>R_{\Omega} / \Omega \text{ cm}^2</math></b>            | 432.50                           | 453.20               | 466.00               | 273.75                                 | 269.8                | 292                  |
| <b><math>Q_{DL} / \text{mS s}^n \text{ cm}^{-2}</math></b>      | 0.73                             | 0.47                 | 0.31                 | 0.42                                   | 0.24                 | 0.31                 |
| <b>n</b>                                                        | 0.35                             | 0.45                 | 0.54                 | 0.59                                   | 0.71                 | 0.58                 |
| <b><math>R_{CT} / \Omega \text{ cm}^2</math></b>                | 2658.50                          | 2605.00              | 885.50               | 516                                    | 223.45               | 219.2                |
| <b><math>Q_{cont} / \mu\text{F cm}^{-2}</math></b>              | 24.58                            | 18.01                | 15.94                | 43.28                                  | 41.62                | 21.74                |
| <b>n</b>                                                        | 0.41                             | 0.45                 | 0.45                 | 0.39                                   | 0.38                 | 0.43                 |
| <b><math>R_{cont} / \Omega \text{ cm}^2</math></b>              | 347.00                           | 399.25               | 475.05               | 218.5                                  | 278.5                | 223.35               |
| <b><math>W / \text{S s}^{-0.5} \text{ cm}^{-2}</math></b>       | 0.05                             | 0.05                 | 0.02                 | 0.01                                   | 0.01                 | 0.01                 |

**Table S1 d: Pt/C electrode**

|                                                                 | Dry air<br>Potential applied / V |                      |                      | Saturated air<br>Potential applied / V |                      |                      |
|-----------------------------------------------------------------|----------------------------------|----------------------|----------------------|----------------------------------------|----------------------|----------------------|
|                                                                 | -1.7                             | -1.9                 | -2.1                 | -1.7                                   | -1.9                 | -2.1                 |
| <b>chi-squared (<math>\chi^2</math>)</b><br><b>K-K analysis</b> | $7.93 \cdot 10^{-5}$             | $6.57 \cdot 10^{-5}$ | $2.69 \cdot 10^{-5}$ | $2.62 \cdot 10^{-6}$                   | $1.09 \cdot 10^{-6}$ | $5.50 \cdot 10^{-6}$ |
| <b>chi-squared (<math>\chi^2</math>)</b>                        | $1.93 \cdot 10^{-4}$             | $1.77 \cdot 10^{-4}$ | $8.56 \cdot 10^{-5}$ | $1.98 \cdot 10^{-5}$                   | $1.80 \cdot 10^{-5}$ | $2.02 \cdot 10^{-5}$ |
| <b><math>R_{\Omega} / \Omega \text{ cm}^2</math></b>            | 472.95                           | 454.5                | 455.3                | 259.65                                 | 254.5                | 258                  |
| <b><math>Q_{DL} / \text{mS s}^n \text{ cm}^{-2}</math></b>      | 0.196                            | 0.164                | 0.17                 | 0.44                                   | 0.3                  | 0.34                 |
| <b>n</b>                                                        | 0.6                              | 0.658                | 0.66                 | 0.59                                   | 0.67                 | 0.67                 |
| <b><math>R_{CT} / \Omega \text{ cm}^2</math></b>                | 1135                             | 726                  | 520                  | 519                                    | 270                  | 179                  |
| <b><math>Q_{cont} / \mu\text{F cm}^{-2}</math></b>              | 3.6                              | 3.2                  | 3.0                  | 6.5                                    | 6.6                  | 6.8                  |
| <b>n</b>                                                        | 0.58                             | 0.56                 | 0.53                 | 0.56                                   | 0.56                 | 0.56                 |
| <b><math>R_{cont} / \Omega \text{ cm}^2</math></b>              | 200                              | 251.65               | 260.85               | 121.75                                 | 130                  | 121.5                |
| <b><math>W / \text{S s}^{-0.5} \text{ cm}^{-2}</math></b>       | 0.066                            | 0.068                | 0.074                | 0.088                                  | 0.134                | 0.134                |

**Table S2:** Parameters of the equivalent circuit in figure 8.

|                                          |                     |
|------------------------------------------|---------------------|
| chi-squared ( $\chi^2$ )<br>K-K analysis | $4.0 \cdot 10^{-5}$ |
| chi-squared ( $\chi^2$ )                 | $3.1 \cdot 10^{-6}$ |
| $R_{\Omega} / \Omega$                    | 3.35                |
| $Q_A / \mu S s^n$                        | 49.1                |
| n                                        | 0.83                |
| $R^p_A / \Omega$                         | 304                 |
| $Q_C / \mu S s^n$                        | 17.5                |
| n                                        | 0.44                |
| $R^p_C / \Omega$                         | 59.2                |

**Activation of the felt anodes:**

- soak the material in pure acetone overnight,
- soak the material in 200 g L<sup>-1</sup> ammonium peroxydisulfate and 1M HCl for 15 min
- wash the material in distilled water
- dry the material in muffle furnace at 450°C for 30 min
